# Supplementary material
Source: Research Square preprint supplement (doi:10.21203/rs.3.rs-9375012/v1)
Supplement: Supplementary file 1 [file ab3c70ed4a4f74114fca37fe.xlsx]

## Sheet: Sheet3
Blocks	Extreme Rainfall Days	1-High, 2- medium, 3- Low	Net crop area	Agricultural Land (%)	1-High, 2- medium, 3- Low	Low Land Area (Elevation)	1-High, 2- medium, 3- Low	Blocks	Extreme Rainfall Days	Agricultural Land (%)	Low Land Area (Elevation)	FARI
Karimpur - I	0.163	3	9660	47.5862	1	15	3	Karimpur - I	3	2	3	270
Kaliganj	0.168	1	19130	54.3466	2	20	3	Kaliganj	1	2	3	170
Karimpur - II	0.163	3	10140	41.7284	1	20	3	Karimpur - II	3	1	3	240
Tehatta - I	0.165	2	16593	62.1461	1	26	3	Tehatta - I	2	1	3	190
Krishnagar - II	0.165	2	9337	71.2748	1	35	2	Krishnagar - II	2	1	2	170
Nakashipara	0.165	2	24400	64.042	1	40	2	Nakashipara	2	1	2	170
Tehatta - II	0.166	1	13327	71.2674	1	51	2	Tehatta - II	1	1	2	120
Krishnagar - I	0.165	2	17277	60.4091	1	55	2	Krishnagar - I	2	1	2	170
Chapra	0.164	2	16842	52.8078	2	75	1	Chapra	2	2	1	180
Hanskhali	0.164	2	12840	46.0215	2	82	1	Hanskhali	2	2	1	180
Ranaghat - I	0.166	1	8047	43.2634	1	91	1	Ranaghat - I	1	1	1	100
Krishnaganj	0.161	3	6247	37.6325	1	94	1	Krishnaganj	3	1	1	200
Nabadwip	0.165	2	6882	63.7222	1	96	1	Nabadwip	2	1	1	150
Chakdah	0.165	2	15232	43.6397	1	98	1	Chakdah	2	1	1	150
Ranaghat - II	0.164	2	13227	48.6287	2	98	1	Ranaghat - II	2	2	1	180
Santipur	0.166	1	8250	41.4573	1	98	1	Santipur	1	1	1	100
Haringhata	0.165	2	10382	62.9212	1	99	1	Haringhata	2	1	1	150
